# Supplementary material for: Genetic diversity and SNP’s from the chloroplast coding regions of virus-infected cassava
Source: PeerJ journal article supplement (doi:10.7717/peerj.8632), 2020-03-02
Supplement: Figure_S1.pdf [file Figure_S1.pdf]

|                  | T03 | T04 | T05 | T06 | T07 | T08 | T09 | T10 | T11 | T12 | K01 | K02 | K03 | K04 | K05 | K07 | K10 | K11 | K12 | K13 | K14 | K15 | M4 | M5 | M8 | M10 | M11 | M16 | M17 | M20 | M23 | DRJL030 | FLA444 | Unk_T... | Tanz_... | TMS I5... | Unk_N... | Moz_M... | Tanz_... |    |
|------------------|-----|-----|-----|-----|-----|-----|-----|-----|-----|-----|-----|-----|-----|-----|-----|-----|-----|-----|-----|-----|-----|-----|----|----|----|-----|-----|-----|-----|-----|-----|---------|--------|----------|----------|-----------|----------|----------|----------|----|
| T03              |     | 1   | 4   | 3   | 1   | 6   | 0   | 2   | 3   | 1   | 17  | 28  | 27  | 28  | 18  | 14  | 14  | 23  | 20  | 18  | 4   | 29  | 9  | 10 | 8  | 10  | 16  | 15  | 17  | 3   | 18  | 23      | 28     | 28       | 23       | 23        | 23       | 28       | 50       | 70 |
| T04              | 1   |     | 3   | 2   | 2   | 7   | 1   | 3   | 4   | 2   | 16  | 27  | 26  | 27  | 19  | 13  | 13  | 22  | 19  | 19  | 5   | 30  | 10 | 11 | 9  | 11  | 15  | 14  | 16  | 4   | 17  | 22      | 27     | 27       | 22       | 22        | 27       | 51       | 69       |    |
| T05              | 4   | 3   |     | 3   | 3   | 8   | 4   | 2   | 2   | 3   | 13  | 24  | 23  | 24  | 16  | 12  | 12  | 19  | 16  | 16  | 3   | 29  | 9  | 8  | 8  | 10  | 12  | 11  | 13  | 3   | 14  | 19      | 24     | 24       | 19       | 19        | 24       | 50       | 66       |    |
| T06              | 3   | 2   | 3   |     | 2   | 7   | 3   | 3   | 4   | 2   | 14  | 25  | 24  | 25  | 19  | 13  | 13  | 20  | 17  | 19  | 5   | 30  | 10 | 11 | 9  | 11  | 15  | 12  | 14  | 4   | 15  | 20      | 25     | 25       | 20       | 20        | 25       | 51       | 67       |    |
| T07              | 1   | 2   | 3   | 2   |     | 5   | 1   | 1   | 2   | 0   | 16  | 27  | 26  | 27  | 17  | 13  | 13  | 22  | 19  | 17  | 3   | 28  | 8  | 9  | 7  | 9   | 15  | 14  | 16  | 2   | 17  | 22      | 27     | 27       | 22       | 22        | 27       | 49       | 69       |    |
| T08              | 6   | 7   | 8   | 7   | 5   |     | 6   | 6   | 7   | 5   | 21  | 32  | 31  | 32  | 22  | 16  | 16  | 27  | 24  | 20  | 8   | 31  | 13 | 14 | 12 | 14  | 20  | 19  | 21  | 7   | 22  | 27      | 32     | 32       | 27       | 27        | 32       | 54       | 74       |    |
| T09              | 0   | 1   | 4   | 3   | 1   | 6   |     | 2   | 3   | 1   | 17  | 28  | 27  | 28  | 18  | 14  | 14  | 23  | 20  | 18  | 4   | 29  | 9  | 10 | 8  | 10  | 16  | 15  | 17  | 3   | 18  | 23      | 28     | 28       | 23       | 23        | 28       | 50       | 70       |    |
| T10              | 2   | 3   | 2   | 3   | 1   | 6   | 2   |     | 2   | 1   | 15  | 26  | 25  | 26  | 16  | 14  | 14  | 21  | 18  | 16  | 3   | 29  | 9  | 8  | 8  | 10  | 14  | 13  | 15  | 3   | 16  | 21      | 26     | 26       | 21       | 21        | 26       | 50       | 68       |    |
| T11              | 3   | 4   | 2   | 4   | 2   | 7   | 3   | 2   |     | 2   | 15  | 26  | 25  | 26  | 16  | 13  | 13  | 21  | 18  | 16  | 1   | 28  | 8  | 8  | 7  | 9   | 14  | 13  | 15  | 2   | 16  | 21      | 26     | 26       | 21       | 21        | 26       | 49       | 68       |    |
| T12              | 1   | 2   | 3   | 2   | 0   | 5   | 1   | 1   | 2   |     | 16  | 27  | 26  | 27  | 17  | 13  | 13  | 22  | 19  | 17  | 3   | 28  | 8  | 9  | 7  | 9   | 15  | 14  | 16  | 2   | 17  | 22      | 27     | 27       | 22       | 22        | 27       | 49       | 69       |    |
| K01              | 17  | 16  | 13  | 14  | 16  | 21  | 17  | 15  | 15  | 16  |     | 11  | 10  | 11  | 9   | 13  | 13  | 16  | 13  | 27  | 14  | 30  | 10 | 7  | 9  | 11  | 9   | 10  | 10  | 14  | 13  | 16      | 17     | 11       | 16       | 16        | 11       | 57       | 59       |    |
| K02              | 28  | 27  | 24  | 25  | 27  | 32  | 28  | 26  | 26  | 27  | 11  |     | 1   | 0   | 20  | 24  | 24  | 5   | 14  | 38  | 25  | 41  | 19 | 18 | 20 | 20  | 12  | 13  | 13  | 25  | 10  | 5       | 6      | 0        | 5        | 5         | 0        | 68       | 48       |    |
| K03              | 27  | 26  | 23  | 24  | 26  | 31  | 27  | 25  | 25  | 26  | 10  | 1   |     | 1   | 19  | 23  | 23  | 6   | 13  | 37  | 24  | 40  | 18 | 17 | 19 | 19  | 11  | 12  | 12  | 24  | 9   | 6       | 7      | 1        | 6        | 6         | 1        | 67       | 49       |    |
| K04              | 28  | 27  | 24  | 25  | 27  | 32  | 28  | 26  | 26  | 27  | 11  | 0   | 1   |     | 20  | 24  | 24  | 5   | 14  | 38  | 25  | 41  | 19 | 18 | 20 | 20  | 12  | 13  | 13  | 25  | 10  | 5       | 6      | 0        | 5        | 5         | 0        | 68       | 48       |    |
| K05              | 18  | 19  | 16  | 19  | 17  | 22  | 18  | 16  | 16  | 17  | 9   | 20  | 19  | 20  |     | 16  | 16  | 25  | 18  | 22  | 17  | 29  | 11 | 8  | 10 | 12  | 14  | 19  | 19  | 15  | 22  | 25      | 26     | 20       | 25       | 25        | 20       | 58       | 68       |    |
| K07              | 14  | 13  | 12  | 13  | 13  | 16  | 14  | 14  | 13  | 13  | 13  | 24  | 23  | 24  | 16  |     | 1   | 29  | 26  | 16  | 14  | 17  | 7  | 8  | 6  | 8   | 14  | 21  | 23  | 11  | 24  | 29      | 30     | 24       | 29       | 29        | 24       | 54       | 72       |    |
| K10              | 14  | 13  | 12  | 13  | 13  | 16  | 14  | 14  | 13  | 13  | 13  | 24  | 23  | 24  | 16  | 1   |     | 29  | 26  | 17  | 14  | 18  | 7  | 8  | 6  | 8   | 14  | 21  | 23  | 11  | 24  | 29      | 30     | 24       | 29       | 29        | 24       | 54       | 72       |    |
| K11              | 23  | 22  | 19  | 20  | 22  | 27  | 23  | 21  | 21  | 22  | 16  | 5   | 6   | 5   | 25  | 29  | 29  |     | 9   | 33  | 20  | 46  | 24 | 23 | 25 | 25  | 17  | 8   | 8   | 20  | 5   | 0       | 5      | 5        | 0        | 0         | 5        | 67       | 47       |    |
| K12              | 20  | 19  | 16  | 17  | 19  | 24  | 20  | 18  | 18  | 19  | 13  | 14  | 13  | 14  | 18  | 26  | 26  | 9   |     | 30  | 17  | 43  | 21 | 20 | 22 | 22  | 16  | 7   | 7   | 17  | 6   | 9       | 14     | 14       | 9        | 9         | 14       | 64       | 56       |    |
| K13              | 18  | 19  | 16  | 19  | 17  | 20  | 18  | 16  | 16  | 17  | 27  | 38  | 37  | 38  | 22  | 16  | 17  | 33  | 30  |     | 17  | 23  | 21 | 20 | 20 | 22  | 28  | 25  | 27  | 15  | 28  | 33      | 38     | 38       | 33       | 33        | 38       | 62       | 80       |    |
| K14              | 4   | 5   | 3   | 5   | 3   | 8   | 4   | 3   | 1   | 3   | 14  | 25  | 24  | 25  | 17  | 14  | 14  | 20  | 17  | 17  |     | 29  | 9  | 9  | 8  | 10  | 15  | 12  | 14  | 3   | 15  | 20      | 25     | 25       | 20       | 20        | 25       | 50       | 67       |    |
| K15              | 29  | 30  | 29  | 30  | 28  | 31  | 29  | 29  | 28  | 28  | 30  | 41  | 40  | 41  | 29  | 17  | 18  | 46  | 43  | 23  | 29  |     | 22 | 23 | 21 | 23  | 31  | 38  | 40  | 26  | 41  | 46      | 47     | 41       | 46       | 46        | 41       | 69       | 89       |    |
| M4               | 9   | 10  | 9   | 10  | 8   | 13  | 9   | 9   | 8   | 8   | 10  | 19  | 18  | 19  | 11  | 7   | 7   | 24  | 21  | 21  | 9   | 22  |    | 3  | 1  | 1   | 9   | 16  | 18  | 6   | 19  | 24      | 25     | 19       | 24       | 24        | 19       | 49       | 67       |    |
| M5               | 10  | 11  | 8   | 11  | 9   | 14  | 10  | 8   | 8   | 9   | 7   | 18  | 17  | 18  | 8   | 8   | 8   | 23  | 20  | 20  | 9   | 23  | 3  |    | 2  | 4   | 8   | 15  | 17  | 7   | 18  | 23      | 24     | 18       | 23       | 23        | 18       | 50       | 66       |    |
| M8               | 8   | 9   | 8   | 9   | 7   | 12  | 8   | 8   | 7   | 7   | 9   | 20  | 19  | 20  | 10  | 6   | 6   | 25  | 22  | 20  | 8   | 21  | 1  | 2  |    | 2   | 10  | 17  | 19  | 5   | 20  | 25      | 26     | 20       | 25       | 25        | 20       | 48       | 68       |    |
| M10              | 10  | 11  | 10  | 11  | 9   | 14  | 10  | 10  | 9   | 9   | 11  | 20  | 19  | 20  | 12  | 8   | 8   | 25  | 22  | 22  | 10  | 23  | 1  | 4  | 2  |     | 10  | 17  | 19  | 7   | 20  | 25      | 26     | 20       | 25       | 25        | 20       | 50       | 68       |    |
| M11              | 16  | 15  | 12  | 15  | 15  | 20  | 16  | 14  | 14  | 15  | 9   | 12  | 11  | 12  | 14  | 14  | 14  | 17  | 16  | 28  | 15  | 31  | 9  | 8  | 10 | 10  |     | 9   | 11  | 15  | 12  | 17      | 18     | 12       | 17       | 17        | 12       | 58       | 60       |    |
| M16              | 15  | 14  | 11  | 12  | 14  | 19  | 15  | 13  | 13  | 14  | 10  | 13  | 12  | 13  | 19  | 21  | 21  | 8   | 7   | 25  | 12  | 38  | 16 | 15 | 17 | 17  | 9   |     | 2   | 12  | 3   | 8       | 13     | 13       | 8        | 8         | 13       | 59       | 55       |    |
| M17              | 17  | 16  | 13  | 14  | 16  | 21  | 17  | 15  | 15  | 16  | 10  | 13  | 12  | 13  | 19  | 23  | 23  | 8   | 7   | 27  | 14  | 40  | 18 | 17 | 19 | 19  | 11  | 2   |     | 14  | 5   | 8       | 13     | 13       | 8        | 8         | 13       | 61       | 55       |    |
| M20              | 3   | 4   | 3   | 4   | 2   | 7   | 3   | 3   | 2   | 2   | 14  | 25  | 24  | 25  | 15  | 11  | 11  | 20  | 17  | 15  | 3   | 26  | 6  | 7  | 5  | 7   | 15  | 12  | 14  |     | 15  | 20      | 25     | 25       | 20       | 20        | 25       | 47       | 67       |    |
| M23              | 18  | 17  | 14  | 15  | 17  | 22  | 18  | 16  | 16  | 17  | 13  | 10  | 9   | 10  | 22  | 24  | 24  | 5   | 6   | 28  | 15  | 41  | 19 | 18 | 20 | 20  | 12  | 3   | 5   | 15  |     | 5       | 10     | 10       | 5        | 5         | 10       | 62       | 52       |    |
| DRJL030          | 23  | 22  | 19  | 20  | 22  | 27  | 23  | 21  | 21  | 22  | 16  | 5   | 6   | 5   | 25  | 29  | 29  | 0   | 9   | 33  | 20  | 46  | 24 | 23 | 25 | 25  | 17  | 8   | 8   | 20  | 5   |         | 5      | 5        | 0        | 0         | 5        | 67       | 47       |    |
| FLA444           | 28  | 27  | 24  | 25  | 27  | 32  | 28  | 26  | 26  | 27  | 17  | 6   | 7   | 6   | 26  | 30  | 30  | 5   | 14  | 38  | 25  | 47  | 25 | 24 | 26 | 26  | 18  | 13  | 13  | 25  | 10  | 5       |        | 6        | 5        | 5         | 6        | 68       | 48       |    |
| Unk_TME3         | 28  | 27  | 24  | 25  | 27  | 32  | 28  | 26  | 26  | 27  | 11  | 0   | 1   | 0   | 20  | 24  | 24  | 5   | 14  | 38  | 25  | 41  | 19 | 18 | 20 | 20  | 12  | 13  | 13  | 25  | 10  | 5       | 6      |          | 5        | 5         | 0        | 68       | 48       |    |
| Tanz_TreeCassava | 23  | 22  | 19  | 20  | 22  | 27  | 23  | 21  | 21  | 22  | 16  | 5   | 6   | 5   | 25  | 29  | 29  | 0   | 9   | 33  | 20  | 46  | 24 | 23 | 25 | 25  | 17  | 8   | 8   | 20  | 5   | 0       | 5      | 5        |          | 5         | 67       | 47       |          |    |
| TMS I50395       | 23  | 22  | 19  | 20  | 22  | 27  | 23  | 21  | 21  | 22  | 16  | 5   | 6   | 5   | 25  | 29  | 29  | 0   | 9   | 33  | 20  | 46  | 24 | 23 | 25 | 25  | 17  | 8   | 8   | 20  | 5   | 0       | 5      | 5        | 0        |           | 5        | 67       | 47       |    |
| Unk_Namik        | 28  | 27  | 24  | 25  | 27  | 32  | 28  | 26  | 26  | 27  | 11  | 0   | 1   | 0   | 20  | 24  | 24  | 5   | 14  | 38  | 25  | 41  | 19 | 18 | 20 | 20  | 12  | 13  | 13  | 25  | 10  | 5       | 6      | 0        | 5        | 5         |          | 68       | 48       |    |
| Moz_Mglaziovii   | 50  | 51  | 50  | 51  | 49  | 54  | 50  | 50  | 49  | 49  | 57  | 68  | 67  | 68  | 58  | 54  | 54  | 67  | 64  | 62  | 50  | 69  | 49 | 50 | 48 | 50  | 58  | 59  | 61  | 47  | 62  | 67      | 68     | 68       | 67       | 67        | 68       |          | 20       |    |
| Tanz_Mglaziovii  | 70  | 69  | 66  | 67  | 69  | 74  | 70  | 68  | 68  | 69  | 59  | 48  | 49  | 48  | 68  | 72  | 72  | 47  | 56  | 80  | 67  | 89  | 67 | 66 | 68 | 68  | 60  | 55  | 55  | 67  | 52  | 47      | 48     | 48       | 47       | 47        | 48       | 20       |          |    |
